# Supplementary material
Source: PubMed Central journal article supplement (PMC4760800)
Supplement: pnas.1524384113.sapp.pdf [file pnas.1524384113.sapp.pdf]

# 1 **SI Appendix**

2

3 **Manuscript:** Molecular requirements for a pandemic influenza virus: an acid-stable  
4 hemagglutinin protein

5 **Authors:** Marion Russier, Guohua Yang, Jerold E. Rehg, Sook-San Wong, Heba H.  
6 Mostafa, Thomas P. Fabrizio, Subrata Barman, Scott Krauss, Robert G. Webster,  
7 Richard J. Webby, Charles J. Russell

8

9

## 10 **SI Methods**

11

12 **Cells and Viruses.** MDCK, A549, and Vero cells were maintained in Dulbecco's modified  
13 Eagle's medium (DMEM) supplemented with 5% fetal bovine serum (FBS). BHK cells were  
14 maintained in DMEM with 10% FBS. NHBE cells (Lonza) were maintained and differentiated  
15 as described (1). A/Tennessee/1-560/2009 recombinant viruses were generated as  
16 described and propagated in MDCK cells (2). Infectious titers were determined by plaque  
17 assay in MDCK cells. Sanger sequencing confirmed virus identity and absence of unintended  
18 mutations. Swine and human influenza viruses obtained from the St. Jude repository (Table  
19 S1) were isolated in 10-day-old embryonated eggs and propagated in MDCK cells if needed.

20

21 **Animal Experiments.** Six-week-old female DBA/2J mice (Jackson Laboratories, Bar Harbor,  
22 ME) were anesthetized with isoflurane and intranasally inoculated with 750 PFU of virus in  
23 30  $\mu$ L PBS. On days 3, 5, 7, and 10, mice were euthanized with CO<sub>2</sub> and the lungs, trachea,  
24 and nasal cavity were collected. 5-month-old male ferrets (Triple F farms) seronegative for  
25 influenza A viruses were anesthetized with isoflurane and inoculated intranasally with 10<sup>6</sup>  
26 PFU in 0.5 ml PBS. Naive ferrets were introduced the following day for contact- and airborne-

27 transmission experiments. Clinical signs, temperature, and weight were recorded daily. Every  
28 other day, nasal washes were collected. On day 3 and 6 after inoculation, ferret tissue from  
29 the trachea and each lobe of the lungs was collected for virus titration and mRNA analysis.  
30 Organs or tissue were homogenized in PBS in the Qiagen Tissue Lyser II. Virus in the  
31 supernatants of centrifuged homogenates was titrated by TCID<sub>50</sub> in MDCK cells.

32

33 **Gene Sequencing.** Sanger and next generation sequencing were used to determine amino-  
34 acid residue variations for ferret nasal wash samples. Sanger sequencing was performed on  
35 the complete gene segments of HA, NA, and M. Next generation sequencing was performed  
36 on the complete HA gene segment. Full-length HA genes were amplified using One-Step RT-  
37 PCR Kit (Qiagen) and H1-specific primers 5'-tgtaaacggccagatgaaggcaataactagtag-3' and 5'-  
38 caggaaacagctatgaccaatacatattctacactgtagagaccca-3'. A few samples required the  
39 amplification of 2 HA segments using additional primers (5'-  
40 tgtaaacgacggccagtgattgcaatacaactgtgc-3' and 5'-  
41 caggaaacagctatgaccgatcggatgtatattctgaaatgg-3'). PCR amplicons were purified by QIAquick  
42 gel extraction kit (Qiagen) and prepared using Nextera XT cDNA library preparation kit  
43 (Illumina) according to the manufacturer's protocol. High-throughput paired-end sequencing  
44 was done using a 2 x 150 bp cycle on an Illumina MiSeq platform. Data analysis was done  
45 using CLC Genomics Workbench 8 (CLC Bio). Briefly, reads were aligned to the sequence of  
46 the wild-type virus, and the mapped reads were put through the Quality-Based Variant  
47 Detection pipeline. The variants were called if they met the predefined quality scores and  
48 present in both forward and reverse reads at equal ratios. In addition, the minimum variant  
49 read frequency was set at 5%, and variants had to be supported by a minimum of 10 reads.  
50 The full HA segment was completely and equally covered for all the samples. The  
51 approximate mean sequencing coverage value for the called variants identified within the  
52 amplicons was 9,460 ( $\pm$  3,761 SD).

53

54 **HA Acid Stability.** HA activation pH was measured by syncytia assay (3). 24 h after  
55 infection, HA-expressing BHK or Vero cells were incubated for 5 min with TPCK-treated  
56 trypsin and pH-adjusted PBS buffers, then neutralized and incubated in regular medium for 3  
57 h at 37°C. Cells were then fixed and stained for microscopy. To measure the effect of acid  
58 exposure on *in vitro* inactivation, virus stocks were incubated 1h at 37°C in pH-adjusted PBS  
59 solutions before neutralization and TCID<sub>50</sub> determination in MDCK cells.

60

61 **HA Expression and Cleavage.** Total and surface expression of HA *in vitro* was measured  
62 as previously described (4, 5). Briefly, the HA and NA genes of pH1N1 (WT or Y17H) were  
63 subcloned into pCAGGS expression vector. Vero cells were transfected with 1µg pCAGGS-  
64 HA and 0.1µg pCAGGS-NA plasmids by using a Lipofectamine Plus expression system  
65 (Invitrogen). The cells were incubated for 24 h at 37°C to allow expression of the HA and NA  
66 proteins. To detect HA cleavage, cells were treated with 5µg/ml TPCK-treated trypsin for 15  
67 min and lysed with radioimmunoprecipitation (RIPA) buffer containing protease inhibitors.  
68 Lysates were electrophoresed on 4% to 12% NuPAGE Bis-Tris polyacrylamide-SDS gels  
69 (Invitrogen), transferred to PVDF membranes, and treated with polyclonal anti-HA goat  
70 antiserum (G618, NR15696, BEI Resources, NIAID, NIH). Protein bands were visualized  
71 using horseradish peroxidase-conjugated anti-goat antibody.

72

73 **Receptor-Binding Specificity Assay.** We used a solid-phase binding assay to measure the  
74 specificity of the HA protein for binding to host α2,3-linked vs. α2,6-linked sialic acid  
75 receptors. Plates were coated with 10µg/ml fetuin (Sigma). 128 HA units of sucrose-purified  
76 virus were then added to the wells. Plates were incubated overnight at 4°C to allow binding  
77 of the virus and then washed with PBS and incubated for 1 h at 4°C with PBS containing  
78 0.1% bovine serum albumin (Sigma) desialyated by treatment with *Vibrio cholera*  
79 neuraminidase. Plates were washed with cold PBS containing 0.01% Tween-80 and  
80 incubated with serial dilutions of biotinylated sialylglycopolymers (3'sialyllactose/3'SL:  
81 Neu5Acα2-3Galβ1-4Glc and 6'sialyllactosamine/6'SLN: Neu5Acα2-6Galβ1-4Glcβ;

82 Glycotech) for 1.5 h at 4°C. After washing, plates were incubated with horseradish  
83 peroxidase-conjugated streptavidin (Invitrogen) diluted 1:500, for 1 h at 4°C. Plates were  
84 then washed and finally incubated with tetramethylbenzidine substrate (Thermo Scientific),  
85 and the optical density was measured at 450 nm. As a control, we used recombinant avian-  
86 like A/Puerto Rico/8/1934 virus expressing the HA of A/Mallard/Alberta/383/2009 H5N1,  
87 which has  $\alpha$ 2,3-sialic acid binding specificity.

88

89 **Virus Growth.** To study multiple-step growth kinetics, confluent monolayers of MDCK, A549,  
90 and NHBE cells were infected with a multiplicity of infection (MOI) of 0.01 PFU/cell.  
91 Supernatants were collected at indicated time points, stored at -80°C, and titrated in MDCK  
92 cells by 50% tissue culture infective dose (TCID<sub>50</sub>) assay as described by (6).

93

94 **Histology and Immunocytochemistry.** Mice and ferrets (3 per group) were euthanized by CO<sub>2</sub>  
95 or by exsanguination under deep anesthesia, respectively. Whole lungs, tracheas, and nasal  
96 turbinates were fixed in 10% neutral buffered formalin, embedded in paraffin, and sliced.  
97 Slides were stained with hematoxylin and eosin or with polyclonal anti-influenza NP  
98 antibody, examined by light microscopy, and scored in a blinded fashion by a pathologist  
99 according to common guidelines (7). Frequency and severity of lesions in the  
100 bronchi/bronchioles, alveoli, and nasal turbinates were incorporated into the total score.  
101 Monocytes/macrophages were stained with rabbit anti-human lysozyme polyclonal antibody  
102 (Dako).

103

104 **Assessment of Pulmonary Inflammation and Vascular Permeability.** Mouse  
105 bronchoalveolar lavage (BALF) samples were collected by washing the lungs three times via  
106 catheter with 0.5 mL PBS containing 2mM EDTA (1.5mL total). After centrifugation, total  
107 infiltrating cells and neutrophils were counted. Supernatants were stored at -80°C.  
108 Proinflammatory cytokines and chemokines were measured by MILLIPLEX mouse magnetic  
109 bead assay (Millipore). Vascular permeability was assessed by assaying high molecular-

110 weight proteins and albumin-bound Evans blue dye in BALF as a measure of pulmonary  
111 extravasation (8). High molecular weight proteins were assayed in BALF by using  
112 Coomassie (Bradford) protein reagent (Thermo Scientific). To measure extravasation of  
113 albumin, Evans blue dye (Sigma) was injected retroorbitally under isoflurane anesthesia.  
114 After 4h, mice were euthanized and lungs were perfused, weighed, and incubated in  
115 formamide for 48 h at 65°C. The lung permeability index of each mouse was calculated by  
116 normalizing the absorbance of formamide at 620 nm to the absorbance of serum.

117

118 **Ferret cytokine mRNA Analysis.** RNA later-preserved ferret tissues were homogenized,  
119 and total RNA was extracted using the RNeasy Mini Kit (Qiagen). IFN- $\alpha$ , TNF- $\alpha$ , IFN- $\gamma$ , IL-6,  
120 IL-8, CXCL9, CXCL10, CXCL11 mRNA levels were analyzed by semiquantitative real-time  
121 PCR analysis on a 7500 Fast Real Time PCR system (Applied Biosystems) as described  
122 previously (9). Briefly, 10 ng of RNA and specific primers were mixed with the QuantiTect  
123 SYBR green RT-PCR master mix (Qiagen), following the manufacturer's instructions.  
124 Specific primers for the following ferret housekeeping gene and cytokines were previously  
125 described: GAPDH, IFN- $\alpha$ , TNF- $\alpha$ , IFN- $\gamma$  and IL-6 (9), IL-8, CXCL9, CXCL10 and CXCL11  
126 (10). Samples were analyzed in triplicate. After normalization to GAPDH, the fold change  
127 ratio of expression in virus-infected to control samples was calculated for each gene by using  
128 the  $\Delta\Delta C_t$  method and expressed as  $2^{-\Delta\Delta C_t}$ .

129

130 **Antibody Titration.** Blood was collected from ferrets 3 weeks after virus inoculation and  
131 centrifuged; anti-pH1N1 antibody was measured in the serum by hemagglutination inhibition  
132 (HI) assay. Briefly, 2-fold serial dilutions of receptor destroying enzyme (RDE)-treated sera  
133 were incubated with pH1N1 virus for 1 h to allow antigen-antibody binding. 0.5% turkey red  
134 blood cells were then added. The HI titer was determined as the reciprocal of the highest  
135 serum dilution that completely inhibited hemagglutination.

136 Enzyme linked-immunosorbent assay (ELISA) was performed as follows to measure the  
137 antibody levels. High-affinity plates were incubated overnight with 1 HA unit per well of

138 sucrose-purified virus (A/Tennessee/1-560/2009 strain) at 4°C. PBS alone was used in  
139 negative control wells. Plates were washed with PBS containing 0.05% Tween 20 and  
140 incubated with 3% BSA for 2 h. Serially diluted sera were added to the wells and incubated  
141 for 3 h. After washing, horseradish peroxidase-linked goat anti-ferret IgG polyclonal antibody  
142 (Abcam) was added for 1 h. Finally, tetramethylbenzidine substrate (ThermoScientific) was  
143 added as chromogen. Optical density (O.D.) was read at 450nm on a microplate reader and  
144 corrected (C.O.D.) by subtraction of the corresponding negative control wells.

145 **SI Appendix References**

146

- 147 1. Krunkosky TM, Martin LD, Fischer BM, Voynow JA, & Adler KB (2003) Effects of  
148 TNFalpha on expression of ICAM-1 in human airway epithelial cells in vitro: oxidant-  
149 mediated pathways and transcription factors. *Free Radic Biol Med* 35(9):1158-1167.
- 150 2. Hoffmann E, Neumann G, Kawaoka Y, Hobom G, & Webster RG (2000) A DNA  
151 transfection system for generation of influenza A virus from eight plasmids. *Proc Natl*  
152 *Acad Sci U S A* 97(11):6108-6113.
- 153 3. Reed ML, *et al.* (2010) The pH of activation of the hemagglutinin protein regulates  
154 H5N1 influenza virus pathogenicity and transmissibility in ducks. *J Virol* 84(3):1527-  
155 1535.
- 156 4. Galloway SE, Reed ML, Russell CJ, & Steinhauer DA (2013) Influenza HA subtypes  
157 demonstrate divergent phenotypes for cleavage activation and pH of fusion:  
158 implications for host range and adaptation. *PLoS Pathog* 9(2):e1003151.
- 159 5. Reed ML, *et al.* (2009) Amino acid residues in the fusion peptide pocket regulate the  
160 pH of activation of the H5N1 influenza virus hemagglutinin protein. *J Virol* 83(8):3568-  
161 3580.
- 162 6. Reed LJ & Muench H (1938) A simple method of estimating fifty per cent endpoints.  
163 *Am J Hyg* 27(3):493-497.
- 164 7. Ward JM & Rehg JE (2014) Rodent immunohistochemistry: pitfalls and  
165 troubleshooting. *Vet Pathol* 51(1):88-101.
- 166 8. Saria A & Lundberg JM (1983) Evans blue fluorescence: quantitative and  
167 morphological evaluation of vascular permeability in animal tissues. *J Neurosci*  
168 *Methods* 8(1):41-49.
- 169 9. Svitek N & von Messling V (2007) Early cytokine mRNA expression profiles predict  
170 Morbillivirus disease outcome in ferrets. *Virology* 362(2):404-410.
- 171 10. Maines TR, *et al.* (2012) Local innate immune responses and influenza virus  
172 transmission and virulence in ferrets. *J Infect Dis* 205(3):474-485.
- 173 11. Daniels RS, *et al.* (1985) Fusion mutants of the influenza virus hemagglutinin  
174 glycoprotein. *Cell* 40(2):431-439.
- 175 12. Thoennes S, *et al.* (2008) Analysis of residues near the fusion peptide in the influenza  
176 hemagglutinin structure for roles in triggering membrane fusion. *Virology* 370(2):403-  
177 414.
- 178 13. Xu R & Wilson IA (2011) Structural characterization of an early fusion intermediate of  
179 influenza virus hemagglutinin. *J Virol* 85(10):5172-5182.

- 180 14. Gorman OT, Bean WJ, Kawaoka Y, & Webster RG (1990) Evolution of the  
181 nucleoprotein gene of influenza A virus. *J Virol* 64(4):1487-1497.
- 182 15. Wright SM, Kawaoka Y, Sharp GB, Senne DA, & Webster RG (1992) Interspecies  
183 transmission and reassortment of influenza A viruses in pigs and turkeys in the United  
184 States. *Am J Epidemiol* 136(4):488-497.
- 185 16. Hinshaw VS, Bean WJ, Jr., Webster RG, & Easterday BC (1978) The prevalence of  
186 influenza viruses in swine and the antigenic and genetic relatedness of influenza  
187 viruses from man and swine. *Virology* 84(1):51-62.
- 188 17. Krumbholz A, *et al.* (2014) Origin of the European avian-like swine influenza viruses.  
189 *J Gen Virol* 95(Pt 11):2372-2376.
- 190 18. Guan Y, *et al.* (1996) Emergence of avian H1N1 influenza viruses in pigs in China. *J*  
191 *Virol* 70(11):8041-8046.
- 192 19. Campitelli L, *et al.* (1997) Continued evolution of H1N1 and H3N2 influenza viruses in  
193 pigs in Italy. *Virology* 232(2):310-318.
- 194 20. Kocer ZA, Krauss S, Stallknecht DE, Rehg JE, & Webster RG (2012) The potential of  
195 avian H1N1 influenza A viruses to replicate and cause disease in mammalian  
196 models. *PLoS One* 7(7):e41609.
- 197 21. Webby RJ, Rossow K, Erickson G, Sims Y, & Webster R (2004) Multiple lineages of  
198 antigenically and genetically diverse influenza A virus co-circulate in the United  
199 States swine population. *Virus Res* 103(1-2):67-73.
- 200 22. Barman S, *et al.* (2012) Pathogenicity and transmissibility of North American triple  
201 reassortant swine influenza A viruses in ferrets. *PLoS Pathog* 8(7):e1002791.
- 202 23. Garten RJ, *et al.* (2009) Antigenic and genetic characteristics of swine-origin 2009  
203 A(H1N1) influenza viruses circulating in humans. *Science* 325(5937):197-201.
- 204 24. Oshansky CM, *et al.* (2014) Mucosal immune responses predict clinical outcomes  
205 during influenza infection independently of age and viral load. *Am J Respir Crit Care*  
206 *Med* 189(4):449-462.

207

208



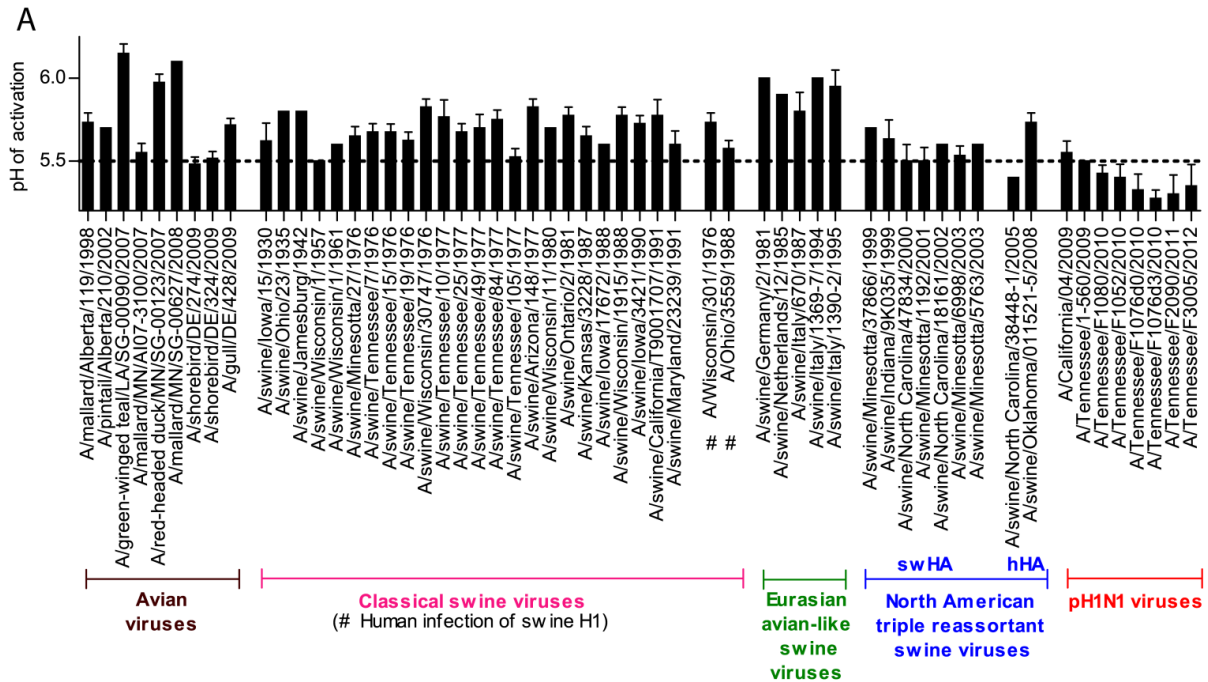

**Figure S1. HA activation pH values for pH1N1 influenza viruses and potential H1 swine precursors.** The panel of viruses included representatives of the classical swine lineage, Eurasian swine lineage, and North American triple reassortant lineage with swine-like (swHA) or human-like (hHA) HA, and early and later human pandemic pH1N1 virus isolates. Avian H1N1 viruses are also included as a point of reference. (A) For comparison, the pH of HA activation of the viruses was determined by using a syncytia assay in Vero cells. Data are the mean  $\pm$  SD from 2-3 independent experiments with duplicates. The dotted line shows the activation pH of the early pH1N1 viruses (pH 5.5). # indicates human infection with swine H1 virus. (B) Maximum likelihood phylogenetic tree based on amino acid sequences inferred from the HA genes of selected H1 influenza viruses. The viruses were selected to represent the classical, Eurasian, and North American triple reassortant swine lineages. Two viruses of the classical swine lineage were isolated from infected humans (#). The human viruses A/Puerto Rico/8/1934 and A/Brisbane/59/2007 (seasonal H1) were added as references. HA amino acid sequences were aligned by using ClustalW Multiple Alignment software (Table S1). The phylogenetic tree was computed by using Mega5.1 software.

B

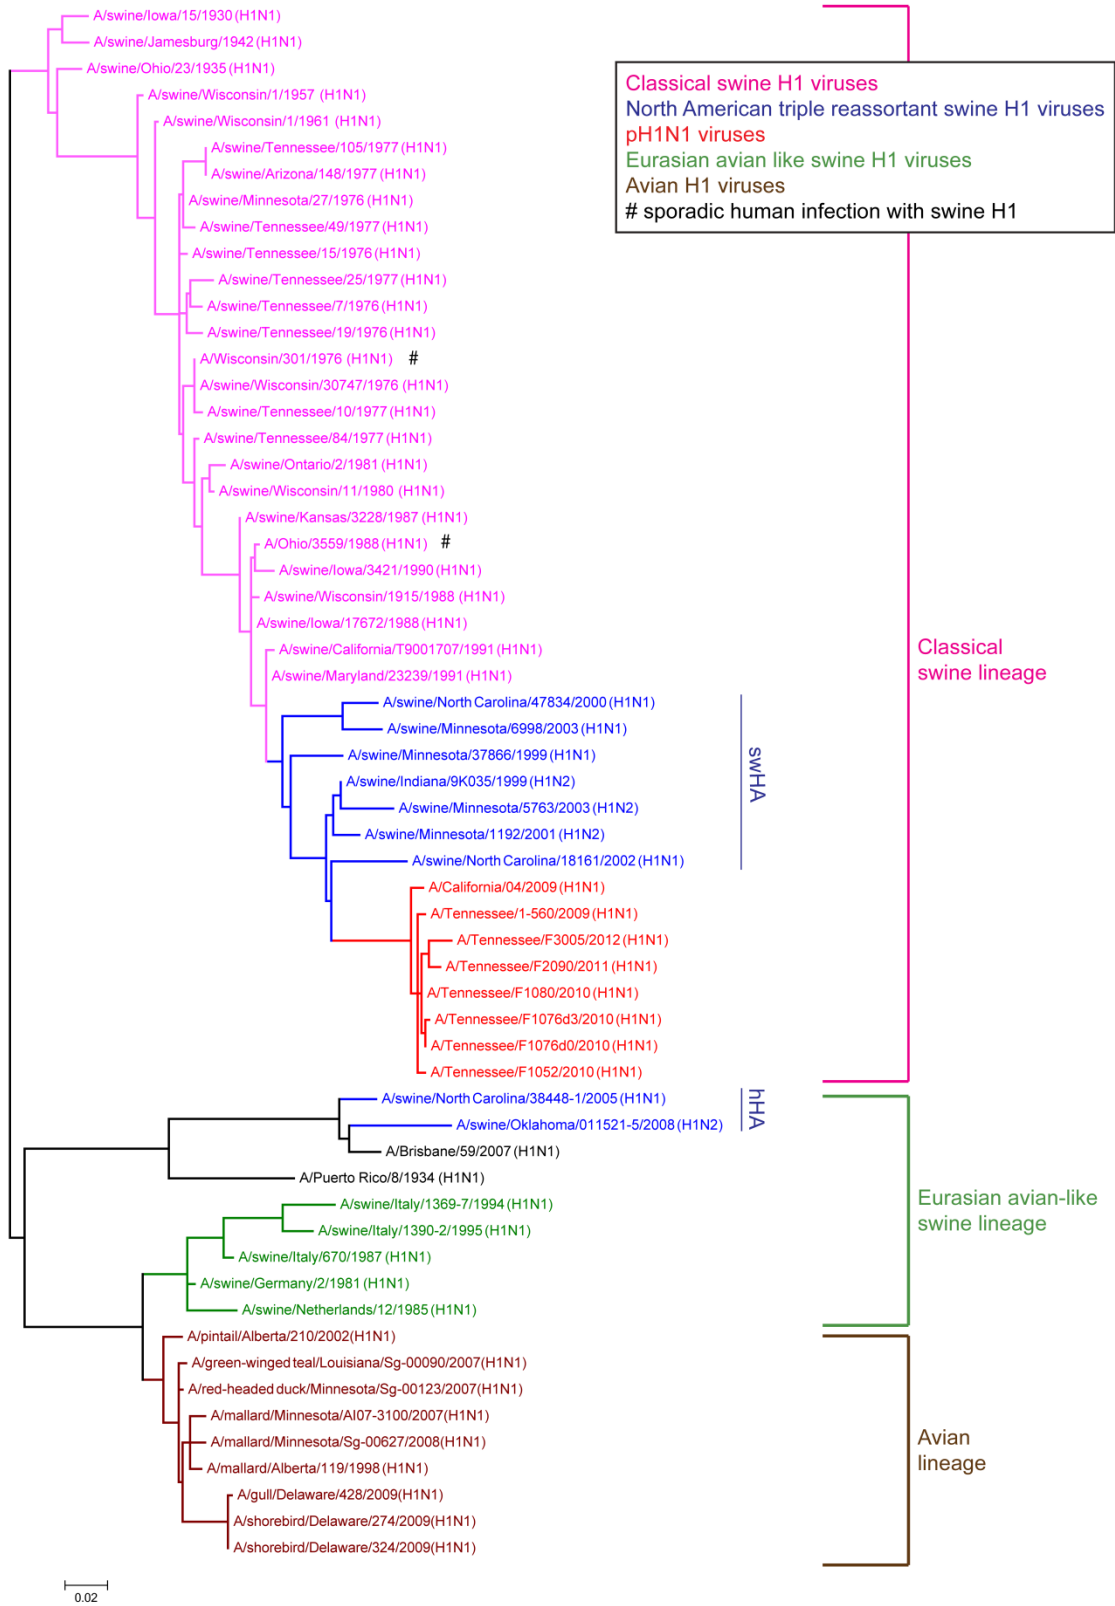

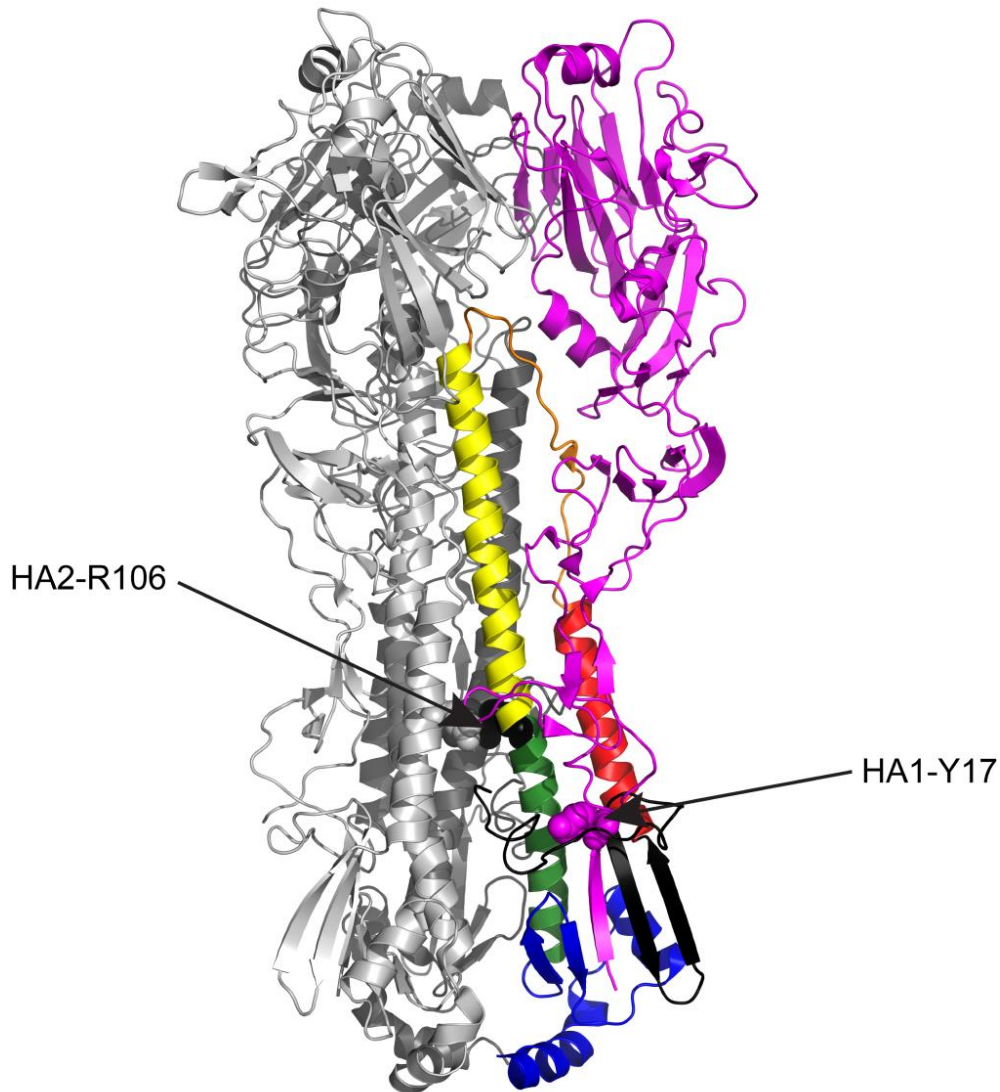

**Figure S2. Locations of mutations in the pH1N1 HA protein.** In the crystal structure of the HA protein of A/CA/04/09 (PDB entry 3UBE), two protomers are shaded gray and a third is color coded as follows: HA1 (magenta), fusion peptide (black), helix A (red), loop B (orange), helix C (yellow), helix D (green), and membrane-proximal region (blue). HA1 residue 17 is located in the fusion peptide pocket where the hydroxyl group of tyrosine in WT forms a hydrogen bond to the fusion peptide. An HA1-Y17H mutation breaks this hydrogen bond, increasing the HA activation pH (11, 12). HA2 residue 106 is positioned in the core of the coiled coil where the three positively-charged WT arginine residues in the trimer interface exert repulsive force, helping to destabilize the core which, once triggered, forms a hinge at this location. An HA2-R106K mutation decreases the electrostatic repulsion in the core, thereby stabilizing the HA protein and decreasing its activation pH (13). H3 numbering is used. Residues HA1-17 and HA2-106 are residues 24 and 450 with respect to the initiating methionine in the H1N1 HA protein (H1 numbering).

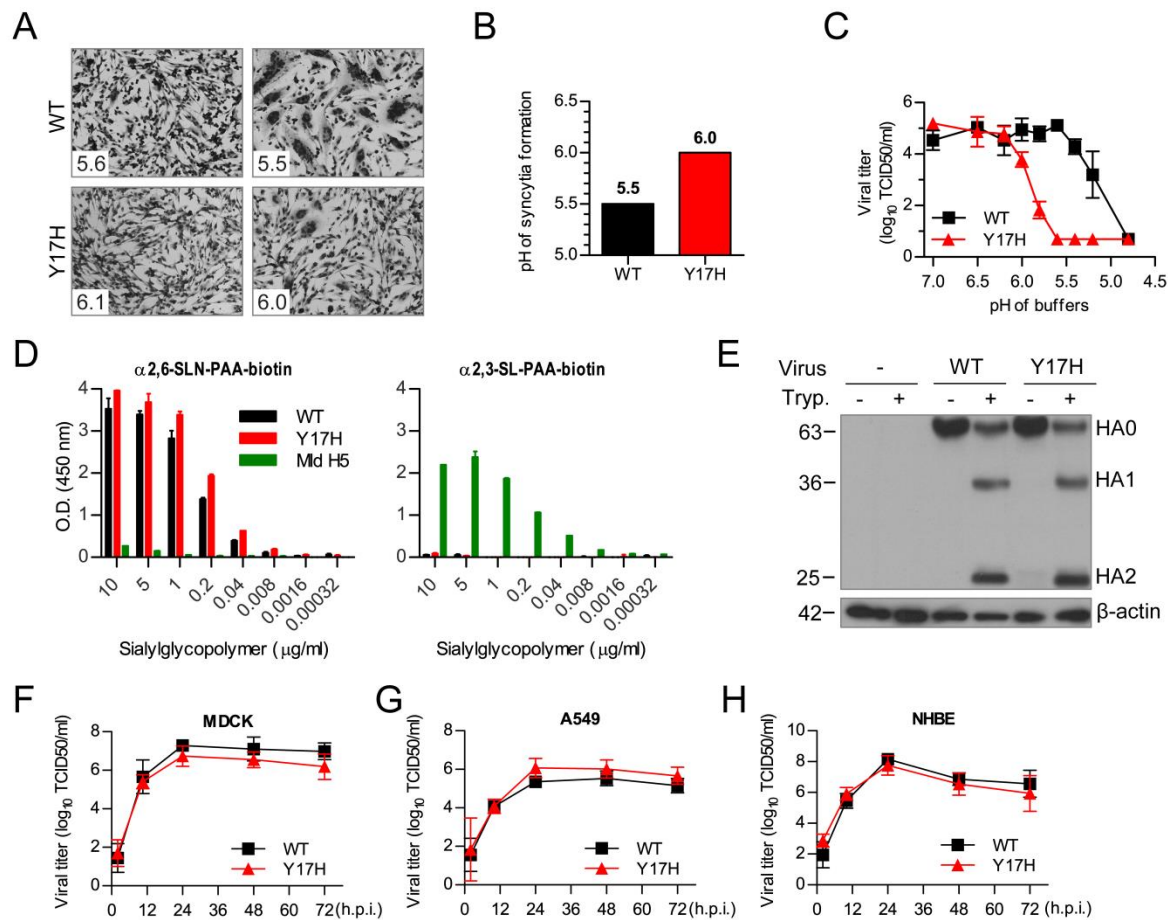

**Figure S3. *In vitro* properties of pH1N1 WT and destabilized HA1-Y17H mutant.** (A) Syncytia formation of BHK cells infected with WT and Y17H viruses. At left, normal monolayer is shown; at right, syncytia are observed after low pH treatment. (B) Mean HA activation pH measured by syncytia formation in BHK and Vero cells. (C) Acid inactivation of WT and Y17H virus. Mean ( $\pm$  SD) of one representative experiment performed in triplicate is shown. (D) HA receptor-binding specificity for  $\alpha$ 2,3- (avian-like) vs.  $\alpha$ 2,6-linked (human-like) glycans as determined by solid-phase assay. Optical density (O.D.) values are the mean ( $\pm$  SD) of one representative experiment performed in duplicate. When combining data from both experiments, there was no significant difference in receptor binding for WT and Y17H. A recombinant avian-like virus expressing H5 HA (Md H5) was included as a control. (E) Western blot showing comparable HA expression and cleavage in infected Vero cells without (-) and with (+) exogenous TPCK-trypsin (Tryp.). (F-H) Virus replication in MDCK (F), A549 (G) and NHBE (H) cells. Virus titers are the mean ( $\pm$  SD) of 2-3 experiments. h.p.i., hours post-inoculation.

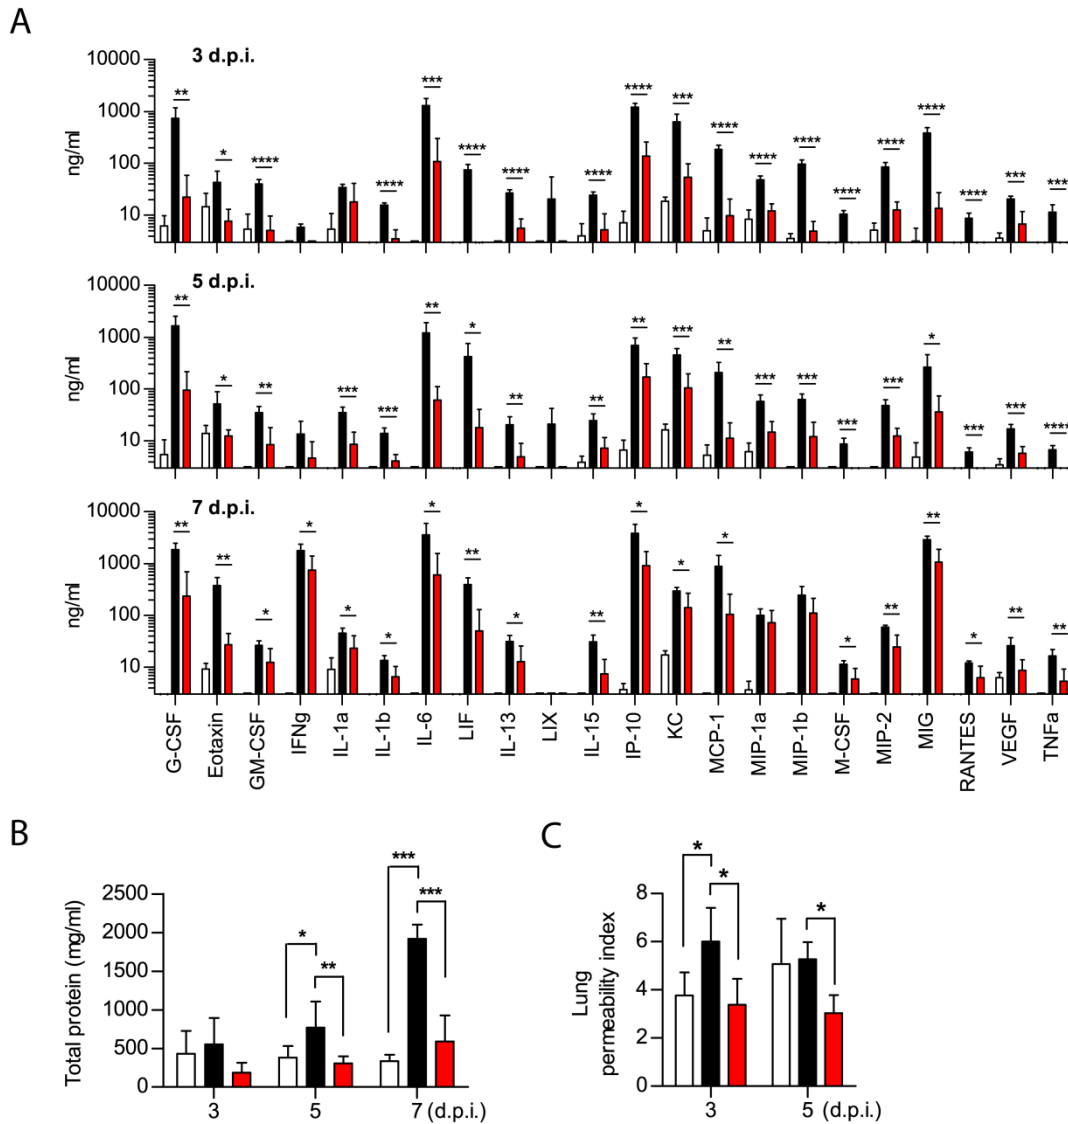

**Figure S4. Inflammatory responses in the lungs of DBA/2J mice.** Mice were inoculated as in Fig. 2. (A) Mean ( $\pm$  SD) concentration of proinflammatory cytokines and chemokines (released by infiltrating cells) in BALF supernatant at 3, 5, and 7 d.p.i. in of 5-6 mice. (B) Mean ( $\pm$  SD) concentration of total protein in BALF at 3, 5, and 7 d.p.i. in groups of 5-6 mice. (C) Mean ( $\pm$  SD) lung permeability at 3 and 5 d.p.i. as indicated by extravasation of Evans blue dye–stained albumin into the airspaces ( $n=5$ ). One-way ANOVA at each time point was followed by Tukey test (B,C) or Student test (A; WT vs. Y17H only): \*,  $p<0.05$ ; \*\*,  $p<0.01$ ; \*\*\*,  $p<0.001$ ; \*\*\*\*,  $p<0.0001$ .



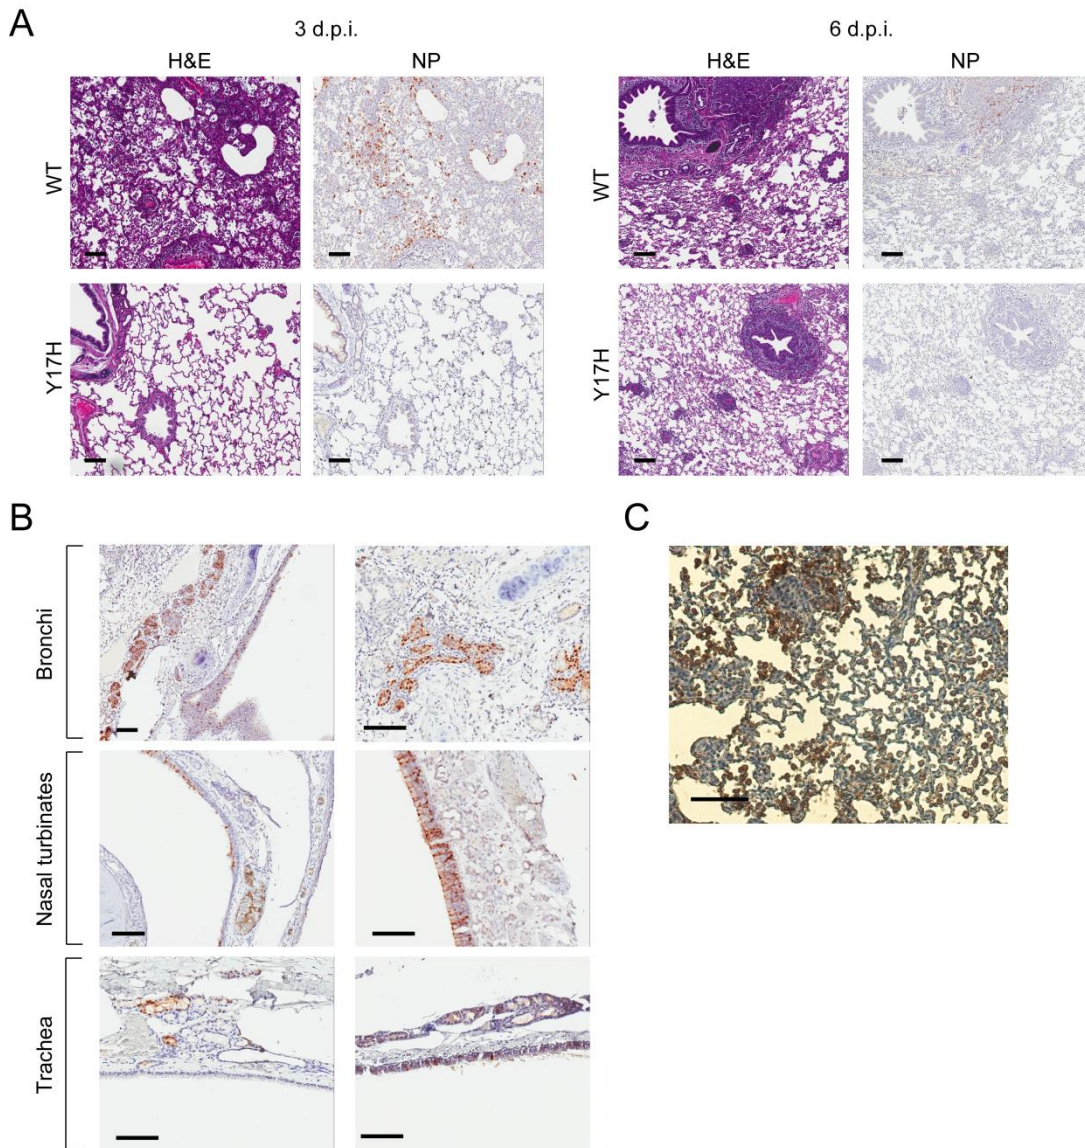

**Figure S5. Histology and immunohistochemistry findings in infected ferrets.** (A) Representative features of lower respiratory tract tissues infected with wild-type (WT) or Y17H–HA mutant (Y17H) pH1N1 virus. Lesions include alveolar septal thickening, infiltration of bronchial and bronchiolar lumens and alveoli with inflammatory cells, pneumocyte hyperplasia, and bronchial and bronchiolar epithelial necrosis producing cell debris in the lumens. The control group showed no lesions (not shown). d.p.i., days post-inoculation; H&E, hematoxylin and eosin; NP, polyclonal anti-NP staining (B) Representative features of bronchi, nasal turbinates, and trachea infected with WT pH1N1 virus showing infection in the epithelium and the submucosal glands. Y17H–HA mutant virus showed similar tissue tropism (not shown). (C) Lysozyme staining shows infiltration of alveoli with monocytes and macrophages during infection with WT virus. Findings were similar after Y17H virus infection (not shown). Scale bar, 100µm.

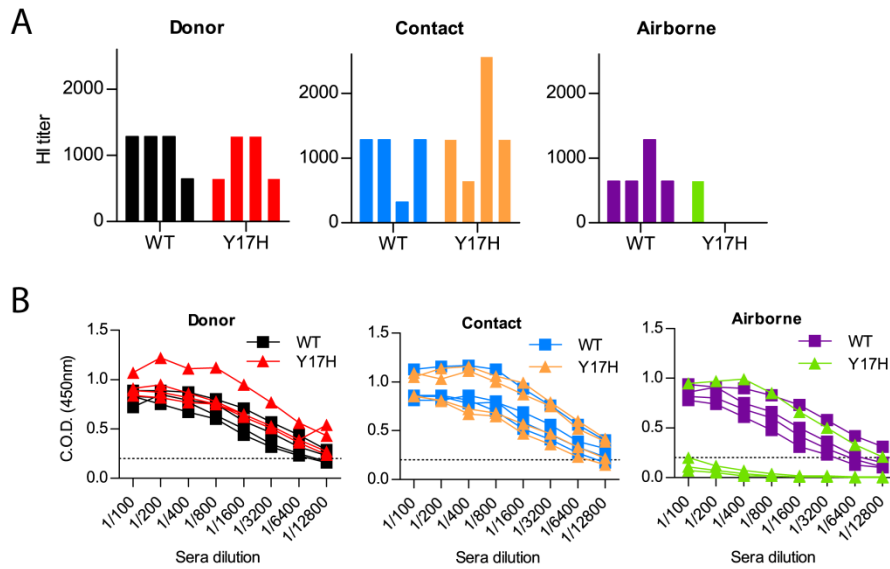

**Figure S6. Serum antibody levels in ferrets infected with WT or Y17H-mutant (unstable HA) pH1N1 viruses.** Four donor ferrets (black and red bars) were inoculated intranasally with  $10^6$  TCID<sub>50</sub> of WT (black, blue, and purple) or Y17H–HA mutant pH1N1 (red, orange, and green). The following day, 1 naïve ferret was introduced into each cage (contact ferret) or into an adjacent cage (airborne-transmission ferret, purple, and green bars). Serum was collected from all animals 3 weeks after donor inoculation. Neutralizing antibody titers were measured by hemagglutination inhibition (HI) assay (A) and total IgG antibody levels were measured by ELISA (B).

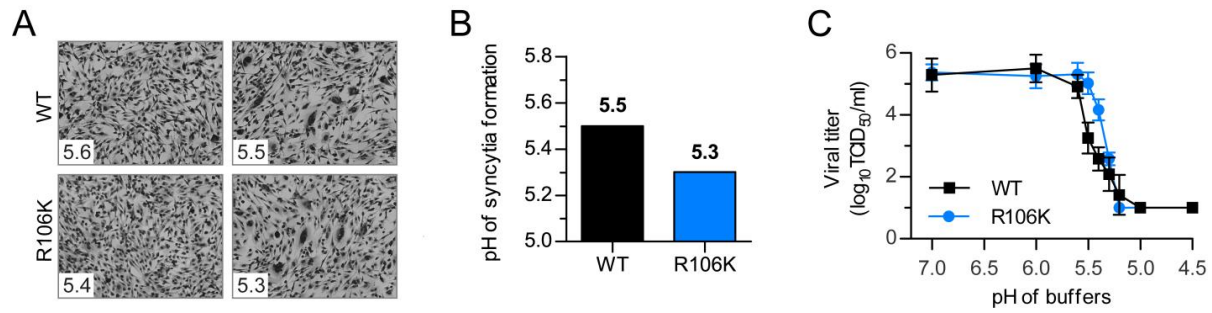

**Figure S7. *In vitro* properties of pH1N1 containing an HA2-R106K mutation.** The mutant virus was generated by reverse genetics. (A) Syncytia formation of BHK cells infected with WT and R106K viruses. At left, normal monolayer is shown; at right, syncytia are observed after low pH treatment. (B) Mean HA activation pH measured by syncytia formation in BHK cells. (C) Acid inactivation of WT (black) and R106K (blue) viruses. Mean ( $\pm$  SD) correspond to two experiments with duplicate samples.



**Table S1. Influenza viruses used in the study.**

| Strain <sup>a</sup>                         | Subtype | GenBank accession number   | Reference                |
|---------------------------------------------|---------|----------------------------|--------------------------|
| A/swine/Iowa/15/1930                        | H1N1    | EU139823                   | (14)                     |
| A/Puerto Rico/8/1934                        | H1N1    | CY121109                   | NA                       |
| A/swine/Jamesburg/1942                      | H1N1    | CY026427.1                 | This report              |
| A/swine/Ohio/23/1935                        | H1N1    | CY027291.1                 | This report              |
| A/swine/Wisconsin/1/1957                    | H1N1    | CY026283.1                 | This report              |
| A/swine/Wisconsin/1/1961                    | H1N1    | CY032213.1                 | This report              |
| A/swine/Minnesota/27/1976                   | H1N1    | CY022357.1                 | (15)                     |
| A/swine/Tennessee/7/1976                    | H1N1    | CY022037.1                 | (16)                     |
| A/swine/Tennessee/15/1976                   | H1N1    | CY022045.1                 | (16)                     |
| A/swine/Tennessee/19/1976                   | H1N1    | CY022061.1                 | (16)                     |
| A/Wisconsin/301/1976                        | H1N1    | CY026139.1                 | (16)                     |
| A/swine/Wisconsin/30747/1976                | H1N1    | CY028187.1                 | (15)                     |
| A/swine/Tennessee/10/1977                   | H1N1    | CY022269.1                 | (16)                     |
| A/swine/Tennessee/25/1977                   | H1N1    | CY009916.1                 | (16)                     |
| A/swine/Tennessee/49/1977                   | H1N1    | CY022133.1                 | (16)                     |
| A/swine/Tennessee/84/1977                   | H1N1    | CY024954.1                 | (16)                     |
| A/swine/Tennessee/105/1977                  | H1N1    | CY026475.1                 | (16)                     |
| A/swine/Arizona/148/1977                    | H1N1    | CY025002.1                 | This report              |
| A/swine/Wisconsin/11/1980                   | H1N1    | CY022421.1                 | (15)                     |
| A/swine/Germany/2/1981                      | H1N1    | KJ889356.1                 | (17)                     |
| A/swine/Ontario/2/1981                      | H1N1    | CY026435.1                 | This report              |
| A/swine/Netherlands/12/1985                 | H1N1    | AF091317.1                 | (18)                     |
| A/swine/Italy/670/1987                      | H1N1    | CY025253.1                 | (19)                     |
| A/swine/Kansas/3228/1987                    | H1N1    | CY022469.1                 | (15)                     |
| A/swine/Iowa/17672/1988                     | H1N1    | CY022333.1                 | This report              |
| A/Ohio/3559/1988                            | H1N1    | CY024925.1                 | This report <sup>b</sup> |
| A/swine/Wisconsin/1915/1988                 | H1N1    | CY022429.1                 | (15)                     |
| A/swine/Iowa/3421/1990                      | H1N1    | CY096875.1                 | (15)                     |
| A/swine/California/T9001707/1991            | H1N1    | CY028780.1                 | (15)                     |
| A/swine/Maryland/23239/1991                 | H1N1    | CY022477.1                 | (15)                     |
| A/swine/Italy/1369-7/1994                   | H1N1    | CY098500.1                 | (19)                     |
| A/swine/Italy/1390-2/1995                   | H1N1    | Not submitted <sup>c</sup> | (19)                     |
| A/mallard/Alberta/119/1998                  | H1N1    | KF424178.1                 | (20)                     |
| A/swine/Minnesota/37866/1999                | H1N1    | EU139827.1                 | (21)                     |
| A/swine/Indiana/9K035/1999                  | H1N2    | AF250124.1                 | (22)                     |
| A/swine/North Carolina/47834/2000           | H1N1    | CY098476.1                 | (22)                     |
| A/swine/Minnesota/1192/2001                 | H1N2    | CY098465-72                | (22)                     |
| A/pintail/Alberta/210/2002                  | H1N1    | KF424114.1                 | (20)                     |
| A/swine/North Carolina/18161/2002           | H1N1    | CY098513-20                | (21)                     |
| A/swine/Minnesota/6998/2003                 | H1N1    | CY098481-88                | (22)                     |
| A/swine/Minnesota/5763/2003                 | H1N2    | CY098489-96                | (22)                     |
| A/swine/North Carolina/38448-1/2005         | H1N1    | CY098506-12                | (22)                     |
| A/Brisbane/59/2007                          | H1N1    | CY030230.1                 | NA                       |
| A/green-winged teal/Louisiana/SG-00090/2007 | H1N1    | KF424090.1                 | (20)                     |
| A/mallard/Minnesota/AI07-3100/2007          | H1N1    | KF424018                   | (20)                     |
| A/redheaded duck/Minnesota/SG-00123/2007    | H1N1    | KF424194.1                 | (20)                     |
| A/mallard/Minnesota/SG-00627/2008           | H1N1    | KF424058.1                 | (20)                     |
| A/swine/Oklahoma/011521-5/2008              | H1N2    | CY045647.1                 | (22)                     |
| A/California/04/2009                        | pH1N1   | FJ966082.1                 | (23)                     |
| A/Tennessee/1-560/2009                      | pH1N1   | CY040457.1                 | This report              |
| A/gull/Delaware/428/2009                    | H1N1    | KF424026.1                 | (20)                     |
| A/shorebird/Delaware/274/2009               | H1N1    | KF424066.1                 | (20)                     |

|                               |       |                            |      |
|-------------------------------|-------|----------------------------|------|
| A/shorebird/Delaware/324/2009 | H1N1  | KF424082.1                 | (20) |
| A/Tennessee/F1052/2010        | pH1N1 | Not submitted <sup>c</sup> | (24) |
| A/Tennessee/F1076d0/2010      | pH1N1 | Not submitted <sup>c</sup> | (24) |
| A/Tennessee/F1076d3/2010      | pH1N1 | Not submitted <sup>c</sup> | (24) |
| A/Tennessee/F1080/2010        | pH1N1 | CY167780.1                 | (24) |
| A/Tennessee/F2090/2011        | pH1N1 | CY167748.1                 | (24) |
| A/Tennessee/F3005/2012        | pH1N1 | Not submitted <sup>c</sup> | (24) |

<sup>a</sup> Swine viruses were isolated during epidemiologic surveys in pig farms. Human pH1N1 viruses were isolated during a human cohort study. A/Puerto Rico/8/1934 and A/Brisbane/59/2007 were used only as references for phylogenetic analysis. All other viruses were obtained from the St. Jude repository.

<sup>b</sup> This virus was isolated from a human after an outbreak of swine influenza in Fort Dix, NJ in 1976.

<sup>c</sup> Viruses were sequenced for this study by the Hartwell Center for Bioinformatics and Biotechnology at St. Jude.  
NA, not applicable.

**Table S2. Extent of infection of respiratory tissues detected by immunohistochemical staining for viral NP antigen in DBA/2J mice and ferrets inoculated with WT or HA1-Y17H–mutant pH1N1 virus.**

|             | 3 d.p.i.                                                    |      | 5 d.p.i. |       |      |
|-------------|-------------------------------------------------------------|------|----------|-------|------|
|             | WT                                                          | Y17H | WT       | Y17H  |      |
| DBA/2J mice | Bronchioles (% NP+) <sup>a</sup>                            | 43%  | 7.3%     | 46.7% | 8.3% |
|             | Alveoli (Total no. NP+ cells) <sup>b</sup>                  | 203  | 11       | 265   | 119  |
|             | Trachea (Total no. NP+ cells) <sup>b</sup>                  | 2    | 31       | 8     | 97   |
|             | Nasal turbinates (Total no. NP+ cells) <sup>b</sup>         | 12   | 0        | 54    | 12   |
|             | 3 d.p.i.                                                    |      | 6 d.p.i. |       |      |
|             | WT                                                          | Y17H | WT       | Y17H  |      |
| ferrets     | Bronchi (Total no. NP+ cells) <sup>c</sup>                  | 524  | 19       | 0     | 0    |
|             | Submucosa (Total no. NP+ cells) <sup>c</sup>                | 3331 | 86       | 134   | 120  |
|             | Bronchioles (Total no. NP+ cells) <sup>c</sup>              | 352  | 66       | 28    | 84   |
|             | Alveoli (Total no. NP+ cells) <sup>c</sup>                  | 854  | 33       | 62    | 112  |
|             | Trachea (Total no. NP+ cells) <sup>d</sup>                  | 6    | 0        | 0     | 0    |
|             | Rostral nasal turbinates (Total no. NP+ cells) <sup>e</sup> | 19   | 87       | 7     | 0    |
|             | Middle nasal turbinates (Total no. NP+ cells) <sup>e</sup>  | 1414 | 3651     | 38    | 267  |
|             | Caudal nasal turbinates (Total no. NP+ cells) <sup>e</sup>  | 3722 | 91       | 245   | 297  |

Mice and ferrets were inoculated intranasally with 750 PFU and  $10^6$  TCID<sub>50</sub> PFU virus, respectively. Tissues were collected at the reported days post-inoculation (d.p.i.). Slides were stained for immunohistochemistry with an anti-influenza virus nucleoprotein (NP) antibody. All control tissues (PBS-inoculated) were negative.

<sup>a</sup> The mean percentage in 3 mice.

<sup>b</sup> The mean total number in 3 mice.

<sup>c</sup> NP-positive cells were counted in one tissue section from each lung lobe and are reported as the mean value in 3 ferrets.

<sup>d</sup> NP+ cells were counted in one cross section and one longitudinal section of the trachea.

<sup>e</sup> The rostral, middle, and caudal divisions of the nasal turbinates comprise 4, 3, and 4 sections, respectively.

**Table S3. Genotypes of pH1N1 viruses isolated from ferrets after transmission.**

| H1 numbering | H3 numbering | Inoculum | Cage #5 |   |         |   | Cage #6 |   |         |   | Cage #7 |   |         |   | Cage #8 |   |         |   | Airborne |   |    |   |   |   |   |
|--------------|--------------|----------|---------|---|---------|---|---------|---|---------|---|---------|---|---------|---|---------|---|---------|---|----------|---|----|---|---|---|---|
|              |              |          | Donor   |   | Contact |   | Donor   |   | Contact |   | Donor   |   | Contact |   | Donor   |   | Contact |   | 7        | 9 | 11 |   |   |   |   |
|              |              |          | 3       | 5 | 7       | 9 | 3       | 5 | 5       | 9 | 1       | 3 | 5       | 7 | 9       | 1 | 3       | 5 | 5        | 7 | 9  |   |   |   |   |
| 24           | HA1-17       | H        |         |   |         | Y |         |   |         |   |         |   |         | Y | Y       | Y |         |   |          |   | Y  | Y | Y | Y | Y |
| 36           | HA1-29       | V        |         | I |         | I | A       |   |         | I | E       | E | E       | E |         |   |         |   |          |   |    |   |   |   |   |
| 100          | HA1-91       | S        |         |   |         | P |         |   |         |   |         |   |         |   |         |   |         |   |          |   |    |   |   |   |   |
| 103          | HA1-93       | D        |         |   |         |   |         |   |         |   |         |   |         |   |         |   |         |   |          |   |    |   |   | G |   |
| 207          | HA1-193      | S        |         |   |         |   |         |   |         |   |         |   |         |   |         |   |         |   |          |   |    |   |   |   | N |
| 214          | HA1-200      | A        |         |   |         | T |         |   |         |   |         |   |         |   |         |   |         |   |          |   |    |   |   |   |   |
| 220          | HA1-206      | T        |         |   |         | S |         |   |         |   |         |   |         |   |         |   |         |   |          |   |    |   |   |   |   |
| 239          | HA1-225      | D        |         |   |         | G |         |   |         |   |         |   |         |   |         |   |         |   |          |   |    |   |   |   |   |
| 305          | HA1-290      | T        | A       | A |         |   | A       | A | I       | A | A       |   |         |   |         |   | A       | A | A        | A | A  | A | A |   |   |
| 306          | HA1-291      | S        | N       | I | N       | I |         | N |         |   |         |   | N       | N |         |   | N       | N | N        | N | N  | N | N | N |   |
| 338          | HA1-323      | V        |         |   |         |   |         |   |         |   | I       |   |         |   |         |   |         |   |          |   |    |   |   |   |   |
| 369          | HA2-25       | H        |         |   | Y       | Y |         |   |         | Y | Y       | Y |         |   |         |   |         |   |          |   |    |   |   |   |   |
| 387          | HA2-43       | N        |         |   |         |   |         |   |         | K |         |   |         |   |         |   |         |   |          |   |    |   |   |   |   |
| 399          | HA2-55       | V        |         |   |         | F |         | I |         |   |         |   |         |   |         |   |         |   |          |   |    |   |   |   |   |
| 442          | HA2-98       | L        |         |   |         |   |         |   |         |   |         |   |         |   |         |   |         |   |          |   |    |   |   |   |   |
| 446          | HA2-102      | L        |         |   |         |   |         |   |         |   |         |   | V       |   |         |   |         |   |          |   |    |   |   |   |   |
| 450          | HA2-106      | R        |         |   |         |   | K       | K | K       | K | K       | K | K       |   |         | K | K       | K | K        | K | K  | K | K | K | K |
| 453          | HA2-109      | D        |         |   |         |   | N       |   |         |   |         |   |         |   |         |   |         |   |          |   |    |   |   |   |   |
| 528          | HA2-184      | Y        |         |   |         | C |         |   |         |   | C       |   |         |   |         |   |         |   |          |   |    |   |   |   |   |

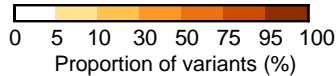

The HA, NA, and M segments of all isolated viruses were sequenced in all virus-containing nasal washes collected at all time points. No substitutions were found in NA or M proteins. No amino changes were found in the WT group.

In the Y17H group, the HA gene of viruses was sequenced by Sanger and next generation sequencing (if enough sample was available). The proportion of variants from next generation sequencing is reported using both H1 and H3 numbering. For cage 5 and 6 donors on day 1 and cage 5 contact recipient on day 5, sufficient sample was not available for next generation sequencing but Sanger sequencing showed no difference from the inoculated virus (HA1-H17 and HA2-R106).
